# Supplementary material
Source: PubMed Central journal article supplement (PMC6936547)
Supplement: pnas.1908712116.sapp.pdf [file pnas.1908712116.sapp.pdf]

1  
2  
3  
4  
5  
6  
7  
8  
9  
10  
11  
12  
13  
14  
15  
16  
17  
18  
19  
20  
21  
22  
23  
24  
25  
26  
27  
28  
29  
30

## Supplementary Information for

### Satellite Observations Reveal Extreme Methane Leakage from a Natural Gas Well Blowout

Sudhanshu Pandey<sup>1,5</sup>, Ritesh Gautam<sup>2</sup>, Sander Houweling<sup>1,3</sup>, Hugo Denier van der Gon<sup>4</sup>, Pankaj Sadavarte<sup>1,4</sup>, Tobias Borsdorff<sup>1</sup>, Otto Hasekamp<sup>1</sup>, Jochen Landgraf<sup>1</sup>, Paul Tol<sup>1</sup>, Tim van Kempen<sup>1</sup>, Ruud Hoogeveen<sup>1</sup>, Richard van Hees<sup>1</sup>, Steven P. Hamburg<sup>2</sup>, Joannes D. Maasackers<sup>1</sup> and Ilse Aben<sup>1</sup>

(1) SRON Netherlands Institute for Space Research, Utrecht, 3584 CA, the Netherlands,

(2) Environmental Defense Fund, New York, NY 10010, USA USA,

(3) Department of Earth Sciences, Vrije Universiteit Amsterdam, Amsterdam, 1081 HV, the Netherlands,

(4) Department of Climate, Air and Sustainability, TNO, Utrecht, 3584 CB, the Netherlands

(5) Institute for Marine and Atmospheric Research Utrecht, Utrecht University, Utrecht, 3584 CC, The Netherlands

Correspondence to: s.pandey@sron.nl

#### **This PDF file includes:**

Supplementary Text

Figs. S1 to S10

Table S1 to S2

Captions for Movie S1

31 **Supplementary Text**

32

33 Section 1: Emission uncertainty quantification

34 The total uncertainty ( $\sigma_{\text{total}}$ ) of the emissions rate  $Q_T$  estimated using the mass balance approach  
35 of *Methods 3* is quantified as follows:

36

37 
$$\sigma_{\text{total}} = \sqrt{\sigma_{\text{meteo}}^2 + \sigma_{\text{sampling}}^2 + \sigma_{\text{precision}}^2 + \sigma_{\text{method}}^2} \dots\dots\dots(\text{S1})$$

38

39 Here,  $\sigma_{\text{meteo}}$  is the uncertainty of  $Q_T$  due to the error in WRF-simulated meteorology.  $\sigma_{\text{sampling}}$   
40 is the uncertainty of  $Q_T$  due to the spatial sampling of TROPOMI XCH<sub>4</sub> on 27 February 2018,  
41 and  $\sigma_{\text{precision}}$  is the uncertainty due to precision of TROPOMI XCH<sub>4</sub> retrievals.  $\sigma_{\text{method}}$  is the  
42 uncertainty of the emission quantification method.

43

44 To quantify  $\sigma_{\text{meteo}}$ , WRF XCH<sub>4</sub> is sampled at six hourly time instances before and after the  
45 TROPOMI overpass time (17:35 UTC). The WRF XCH<sub>4</sub> output for each time instance is then  
46 interpolated and re-gridded to the TROPOMI measurement pixels (see Fig. S3), which are then  
47 used to generate multiple emission estimates (see Table S1) resulting in a  $\sigma_{\text{meteo}}$  of 14 t/hr.  
48 Note that  $\sigma_{\text{meteo}}$  accounts for inaccuracies in the time interpolation as well as the temporal  
49 representation of meteorological variations, including wind speed and direction, in the WRF  
50 simulations.  $\sigma_{\text{sampling}}$  was calculated by bootstrapping the emission-influenced and background  
51 pixels. 10,000 instances of half the number of emission-influenced pixels (=15) and background  
52 pixels (=5) were randomly selected and used to calculate 10,000  $Q_T$  values. The spread of these  
53  $Q_w$  is  $\sigma_{\text{sampling}} = 25$  t/hr.  $\sigma_{\text{precision}}$  is the error on the  $Q_T$  due to precision error of individual  
54 TROPOMI XCH<sub>4</sub> retrievals in the emission-influenced and background regions. Note that the  
55 precision error represents the influence of the radiance measurement noise on TROPOMI XCH<sub>4</sub>.  
56 (provided as *XCH4\_precision* in TROPOMI data products, see Hu et al., 28). By propagating the  
57 precision error of the measurements, we find  $\sigma_{\text{precision}} = 3.2$  t/hr.  $\sigma_{\text{method}}$  is taken as the 1  
58 standard deviation of mean emission rate estimates from 4 different approaches: 1. mass balance  
59 method with 1-band retrievals (see *Methods 3*); 2. cross-sectional flux (CSF) method with 1-band  
60 retrievals (SI Section 2); 3. slope method (SI Section 3) with 1-band retrievals; 3. mass balance  
61 method with 2-band retrievals (SI Section 4). The  $\sigma_{\text{method}}$  is found to be 13 t/hr. Finally, using  
62 Equation S1, we calculate  $\sigma_{\text{total}} = 32$  t/hr.

63

64 Our WRF simulation is nudged to NCEP meteorological fields. To ensure that we are not  
65 underestimating  $\sigma_{\text{meteo}}$  by sampling output of a single meteorological model at multiple time  
66 steps, we consider the instantaneous wind speed at 10-meter height  $U_{10}$  in the blowout region  
67 from two additional meteorological models (see Table S2). Varon et al. (1) derived the empirical  
68 relation between  $U_{10}$  and effective wind speed  $U_{\text{eff}}$  for the integrated mass enhancement (IME)  
69 method ( $U_{\text{eff}} = a \log U_{10} + 0.6$ ,  $a = 1.0 \pm 0.1 \text{ ms}^{-1}$ ) and CSF method ( $U_{\text{eff}} = b U_{10}$ ,  $b =$   
70  $1.4 \pm 0.1$ ). Note that the IME method of Varon et al. (1) is similar to mass balance method  
71 used in this study. In both CSF and IME methods, the emission estimate  $Q$  is directly  
72 proportional to the  $U_{\text{eff}}$ . The  $U_{10}$  of NCEP, ERA-5 and ERA-interim have a 1 standard deviation  
73 of  $0.2 \text{ ms}^{-1}$ . This 7% error on  $U_{10}$  translates to 10 % error on CSF's  $U_{\text{eff}}$ , and 6% error on mass

74 balance's  $U_{eff}$ . These errors are lower than  $\sigma_{meteo}$  (= 12%) providing further confidence that we  
75 are not underestimating the meteorological error.

76  
77  
78 Section 2: Emission quantification using the CSF method

79 As an alternative to the area-integral-based mass balance approach (see *Methods* 3), we also use  
80 the cross-sectional flux (CSF) method as described in Varon et al. (1) to quantify the blowout  
81 emission rate. In this method, the measurement-derived emission rate  $Q$  of an isolated point  
82 source is quantified using the line-integral mass balance technique along a transect across the  
83 plume:

84  
85  
86  $C = \int_{-\infty}^{+\infty} \Delta\Omega(x, y) dy \dots\dots\dots(S2)$

87  
88  $Q = CU_{eff} \dots\dots\dots (S3)$

89 where  $C$  is the tracer enhancement integrated along the transect line (in the  $y$  direction),  
90 perpendicular to the wind direction (blowing in the  $x$  direction), over the detectable width of the  
91 plume.  $U_{eff}$  is the effective wind speed at which column averaged  $CH_4$  is transported at the  
92 location of the transect line.  $\Delta\Omega$  is the  $XCH_4$  enhancement relative to an upwind background for  
93 a given measurement along the transect. This method can be applied to multiple transect lines at  
94 different distances downwind of the source resulting in multiple estimates of  $Q$ . These estimates  
95 can be used to derive error characteristics of  $Q$

96  
97  
98 We made 20 transect lines downwind of the blowout location and perpendicular to the local wind  
99 direction (see Fig. S4). The upwind background is the same as used for the mass balance method.  
100 For each pixel intersecting a transect line, the product of  $\Delta\Omega$ , and the length of intersection of the  
101 transect lines and the pixel was calculated. These numbers were added and multiplied by the  $U$   
102 which was calculated from the WRF  $XCH_4$  output: for the blowout tracer, emission rate  $Q_w$  is  
103 known and the line integrals  $C_w$  for each transect line can be calculated from the corresponding  
104  $XCH_4$  output. The ratio between  $Q_w$  and the error weighted average of  $C_w$  gives  $U_{eff} = 5.2 \text{ m s}^{-1}$ .  
105 Using the empirically derived relation ( $U_{eff} = bU_{10}$ ,  $b = 1.4 \pm 0.1$ ) given in Varon et al. (1)  
106 and  $U_{10}$  from NCEP-FNL (see Table S2), which is used as meteorological boundary condition in  
107 WRF, we calculate  $U_{eff} = 4.4 \pm 0.5 \text{ m s}^{-1}$ . This  $U_{eff}$  is slightly smaller than WRF-derived  $U_{eff}$ . In  
108 line with Varon et al. (1), we assume a 40% uncertainty on  $U_{eff}$ . Note that calculating  $C_w$  on the  
109 WRF  $XCH_4$  regridded TROPOMI pixels also accounts for the bias introduced applying the  
110 mass-balance method to coarse resolution TROPOMI measurements.

111  
112 The  $Q$  values calculated for the transect lines in Fig. S4 are shown in Fig. S5. The error-weighted  
113 average of these  $Q$  values is  $130 \pm 28 \text{ t/hr}$ . The uncertainty  $\sigma_{total}$  of  $Q$  is calculated as follows

114  
115  $\sigma_{total} = \sqrt{\sigma_{meteo-sampling}^2 + \sigma_{precision}^2 + \sigma_{method}^2} \dots\dots\dots(S4)$

116

117  $\sigma_{\text{meteo-sampling}}$  is the combined error due to meteorology and TROPOMI XCH<sub>4</sub> sampling. It is  
118 calculated by first estimating  $Q$  values for each transect line on WRF XCH<sub>4</sub> using  $U_{\text{eff}} = 5.2 \text{ ms}^{-1}$ .  
119 The 1 standard deviation of the difference between the  $Q$  values of WRF and TROPOMI for all  
120 transect lines (red curve in Fig. S5) gives  $\sigma_{\text{meteo-sampling}}$ .  $\sigma_{\text{precision}}$  is the TROPOMI XCH<sub>4</sub>  
121 retrieval precision (as in Section 1).  $\sigma_{\text{method}} = 13 \text{ t/hr}$  is the uncertainty due to use of CSF  
122 method on 1-band data (as in Section 1). Overall, this method leads to  $\sigma_{\text{total}} = 28 \text{ t/hr}$ .  
123

124 The variability in  $Q$  is in large part due to the TROPOMI sampling and meteorological  
125 variability as a similar variability is found for WRF  $Q$  values. This is shown in Fig. S5. To  
126 facilitate comparison, the WRF  $Q$  values shown in Fig. S5 are multiplied with 1.625 so that their  
127 mean matches the mean of TROPOMI  $Q$  values. The Pearson correlation coefficient between  
128 WRF and TROPOMI-derived  $Q$  values is 0.77, indicating that 60% of the variability in the  
129 TROPOMI  $Q$  values can be explained by the TROPOMI sampling, and meteorological effects  
130 such as wind variability and changes in boundary layer height, which are simulated in WRF. The  
131 rest of the variability could be caused by errors in TROPOMI measurements and/or errors in the  
132 WRF-simulated transport.  
133

### 134 135 Section 3: Emission quantification using the slope method

136 The blowout Emission rate can be estimated using the slope method as in Kort et al. (2). By  
137 performing linear regression between TROPOMI and WRF XCH<sub>4</sub> (see Fig. S6), we find a slope  
138 of  $1.23 \pm 0.14$ . By multiplying this slope with the emission rate of 80 t/hr used in the WRF  
139 simulation, emission rate of  $98 \pm 22 \text{ t/hr}$  is calculated. This compares well with our mass balance  
140 estimate of  $120 \pm 32 \text{ t/hr}$ . The two methods are not expected to yield the same answer, since the  
141 slope method uses WRF and TROPOMI XCH<sub>4</sub> values for each pixel, whereas, the mass balance  
142 method uses the difference between averages of background and blowout-influenced pixels  
143 resulting in a different weighing.  
144

### 145 146 Section 4: Emission quantification using 2-band retrievals

147 Here we quantify the emission rate for the blowout using data from the operational 2-band  
148 TROPOMI XCH<sub>4</sub> retrievals. We find XCH<sub>4</sub> enhancement in the 2-band retrievals that are similar  
149 to the 1-band retrievals during the Ohio blowout. The emission quantification with the 2-band  
150 retrievals (*Methods 3*) yields  $100 \pm 32 \text{ t/hr}$ , which is in close agreement with the emission rate  
151 estimate from the 1-band retrievals of  $120 \pm 32$ . The 1-band and 2-band XCH<sub>4</sub> product differ in  
152 the spectral information used to constrain the retrieval (only the 2-band retrieval uses NIR data).  
153 Both the 1-band and 2-band TROPOMI XCH<sub>4</sub> products show small striping effects. In this study,  
154 neither of the products is corrected for striping effect as the available methods may introduce  
155 new errors. We have checked and found that the striping effect in XCH<sub>4</sub> is significantly smaller  
156 than the signal associated with the Ohio blowout event. In addition, the sampling error  
157 ( $\sigma_{\text{sampling}}$ ) derived using the bootstrapping method should account for the error due to the  
158 striping effect (Section 1).  
159

160  
161  
162

163 Section 5: Influence of regular emissions

164 In our emission quantification method (*Methods 3*), the TROPOMI XCH<sub>4</sub> enhancement ( $X_T$ )  
165 also includes enhancements due to regular emissions in the blowout-influenced region (see Fig.  
166 S7). These emissions are accounted for since the WRF XCH<sub>4</sub> enhancement ( $X_w$ ) is calculated by  
167 taking the sum of the EPA, blowout and boundary tracers. The effect of the regular emission will  
168 cancel out in  $\frac{X_T}{X_w}$  if the EPA emissions are a good estimate of the anthropogenic emissions. We  
169 assess the impact of EPA emissions being an underestimate of the regular emissions in the  
170 downwind enhancement region. The XCH<sub>4</sub> enhancement of the EPA tracer ( $X_w^{epa}$ ) is 1.5 ppb,  
171 which is ~5% of  $X_w$  (= 27 ppb) for sum of all WRF tracers. If the EPA underestimates the  
172 emissions in the blowout-influenced region by a factor of 5,  $X_w$  would be 33 ppb ( $X_w +$   
173  $4 \times X_w^{epa}$ ), resulting in  $Q_T = 97$  t/hr. This estimate is still in statistical agreement with the  
174 original emission estimate of  $120 \pm 32$  t/hr, indicating that our results are robust to EPA inventory  
175 uncertainties.

176  
177 Further, we also do a CSF quantification for the same transects lines and background area used  
178 for 27 February 2018 (SI Section 2) but for measurements on 28 November 2017, i.e., before the  
179 blowout when wind conditions were similar. Then we find a  $Q$  of 2 (-2/+7) t/hr, which is well  
180 within the estimated uncertainty of  $Q$  of 28 t/hr during the blowout. This further supports our  
181 finding that the large downwind XCH<sub>4</sub> enhancements along the transects are caused primarily by  
182 the blowout CH<sub>4</sub> emissions and are not due to regular emissions in the region.

183  
184 During all overpasses –albeit somewhat less pronounced on 20 April 2018—a secondary  
185 enhanced region around the city of Pittsburgh is visible, likely caused by sustained emissions due  
186 to O&G and coal mining operations in that area as suggested by EPA inventory (Fig. S8). It  
187 should be noted that the local Pittsburgh area emissions is not expected to contribute to the  
188 blowout enhancement due to the orientation of wind fields and use of *influence* mask (see Fig. 2c  
189 of main text).

190  
191

192 Section 6: Source pixel enhancement

193 In Fig. 2c of the main text, we observe that the pixel containing the blowout, as well as the one  
194 immediately downwind of it, show a less pronounced XCH<sub>4</sub> enhancement than the pixels further  
195 downwind. This could be for a number of reasons. First, in the pixel containing the well blowout,  
196 the location of the well is half-way in the downwind direction, (see Fig. S9b) and this would  
197 cause only a partial enhancement. It is noteworthy that this low XCH<sub>4</sub> enhancement would not be  
198 captured by the WRF simulation as the “point source” is an evenly distributed CH<sub>4</sub> emission  
199 source over a WRF grid pixel of 5 km × 5 km, causing a local representation error. The  
200 TROPOMI pixel size is 7 km × 7 km at nadir. However, the pixels shown in the analysis region  
201 are 25 km wide because they are near the edge of the swath, and are thus stretched due to the  
202 large viewing zenith angle. Second, there can be a bias in the XCH<sub>4</sub> measurements caused by  
203 scattering of light due to simultaneously emitted liquid droplets and fine particles such as water  
204 and hydraulic fracturing fluids which can also be seen in the video of the blowout (see Movie  
205 S1). Third, the logarithmic dependence of XCH<sub>4</sub> on the absorption line depth would also result in  
206 an underestimate of average XCH<sub>4</sub> in the partially enhanced pixels. The partial pixel  
207 enhancement effect would be less significant further downwind of the source once the plume  
208 widths increases and becomes comparable to the pixel width. This is evident in the large

209 enhancements ( $106 \pm 2$  ppb, Fig. 1b) seen at 36 km downwind of the source. The development of  
210 a spatially dispersed plume is also evident in WRF XCH<sub>4</sub> (see Fig. 2a of main text).

211  
212

### 213 Section 7: Total emission quantification

214 The uncertainty of extrapolating the blowout emission rate to the full 20-day period is difficult to  
215 assess from only a single instantaneous emission estimate derived from TROPOMI, without  
216 knowing the time dependence of the emissions. However, a range of total emission can be  
217 derived by considering a range of plausible emission rate time dependences. The gas well can be  
218 described as a pressurized chamber of finite volume leaking gas from a small orifice. For such a  
219 well, an exponentially declining emission rate during the blowout period is expected, with e-  
220 folding time equal to the ratio of the reservoir capacity and the instantaneous leakage rate. An  
221 approximately constant emission rate occurs if the leakage during the blowout period is small  
222 compared with the well capacity, i.e., e-folding time is very large compared to the blowout  
223 period. An exponential reduction has been observed in previous studies measuring emission rates  
224 from gas well blowout episodes: Conley et al. (3) observed exponentially decreasing emissions  
225 from the Aliso Canyon storage tank during the major portion of the ~3.5 month leakage period.  
226 Lee et al. (4) observed a decreasing emission rate from the uncontrolled Elgin platform gas  
227 release over a period of a month and a half, in the North Sea. Although not mentioned explicitly  
228 by Lee et al. (4), their measurements point to exponentially decreasing emissions.

229

230 For the Ohio blowout gas well, the pressure inside the chamber is proportional to the  $N$  moles of  
231 gas that are present as determined by the ideal gas law. Everything else kept constant, the  
232 emission rate  $Q$  is proportional to the pressure difference across the orifice. Assuming the  
233 pressure inside the well is many times larger than the atmospheric pressure outside and  
234 negligible changes in temperature,  $Q$  is given by

235

$$236 \quad Q(t) = \frac{dN}{dt} \approx -\lambda N$$

237

238 Where  $\lambda$  is a constant. Using this equation, we derive the total emission  $E$  until a given time ( $t_c$ )  
239 of the blowout as a function of the ratio between initial emission rate  $Q_0$  and the emission rate  $Q_t$   
240 at measurement time  $t_m$  as

241

$$242 \quad E = \frac{Q_t(1 - e^{-\lambda t_c})}{-\lambda e^{\lambda t_m}}$$

243

$$244 \quad \lambda = \frac{\log(Q_t/Q_0)}{t_m}$$

245 Using these equations, the  $E$  for the Ohio blowout is shown in Fig. S10 with  $t_c = 20$  days,  $t_m =$   
246 13 days and  $Q_t = 120$  t/hr for  $0.1 < \frac{Q_t}{Q_0} < 1$ . Assuming a near-constant emission rate, we get a  
247 total emission of 57 kt CH<sub>4</sub> (or  $60 \pm 15$  after accounting for uncertainties in the blowout emission  
248 rate). Any sustained exponential decrease in the emission rate leads to  $E > 57$  kt CH<sub>4</sub>, which  
249 means that we are likely underestimating our total emission estimate and its uncertainty.

250

251

252 **Table S1:** Uncertainty estimation due to meteorological errors derived as the sensitivity of the  
253 emission estimate to the temporal sampling of WRF.  
254

| <b>Hour (UTC)</b>                                              | <b>Q (t/hr)</b> |
|----------------------------------------------------------------|-----------------|
| 15:00                                                          | 135             |
| 16:00                                                          | 93              |
| 17:00                                                          | 96              |
| 18:00*                                                         | 116             |
| 19:00                                                          | 112             |
| 20:00                                                          | 110             |
| <b>Standard deviation (<math>\sigma_{\text{meteo}}</math>)</b> | <b>14</b>       |

255 \*Hour of WRF output used to quantify the blowout emission.  
256

257 **Table S2.** 10-meter wind speed averaged over the Ohio blowout region at 18:00 UTC on 27  
258 February 2018, closest to the TROPOMI overpass time.  
259

| Meteorological Model  | wind speed $\pm$ standard error ( $\text{ms}^{-1}$ ) |
|-----------------------|------------------------------------------------------|
| NCEP-FNL (5)          | $3.1 \pm 0.3$                                        |
| ECMWF ERA-5 (6)       | $2.8 \pm 0.1$                                        |
| ECMWF ERA-interim (7) | $3.3 \pm 0.1$                                        |

260



261

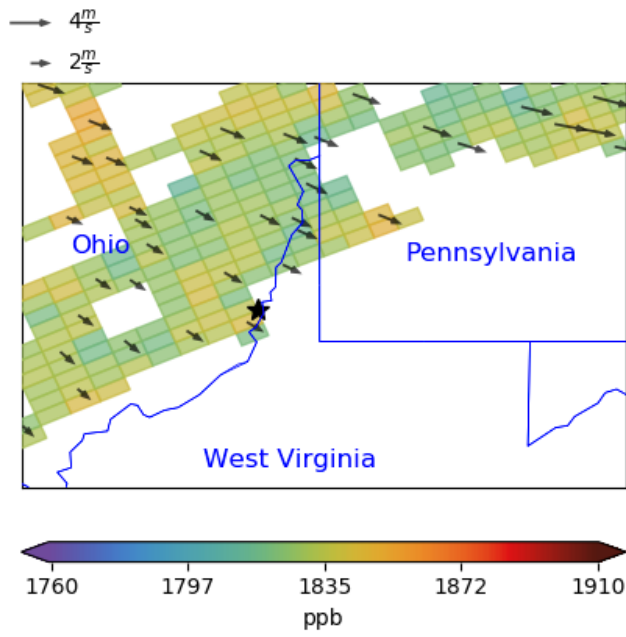

262  
263  
264

**Fig. S1.** As Fig. 1b in the main text but for 26 February 2018.

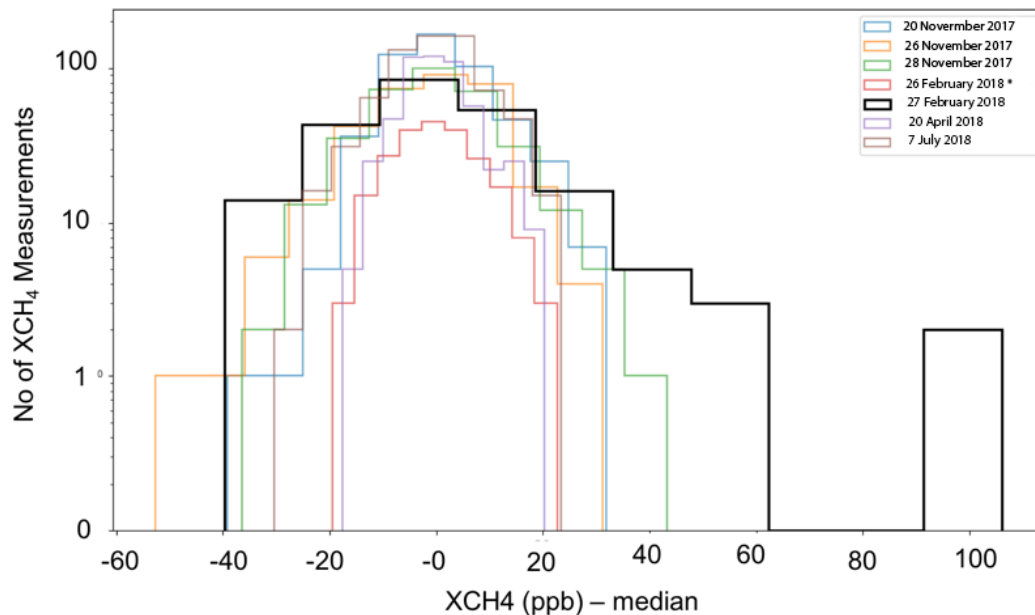

265  
 266 **Fig. S2.** Distribution of TROPOMI measurements for days with sufficient coverage in the  
 267 blowout region, as shown in Fig. 1 of main text, after subtracting the median of all measurements  
 268 on the respective day. Notice that the distribution of XCH<sub>4</sub> on 27 February 2018 (during blowout  
 269 period), is positive-skewed in comparison to other days due to the large CH<sub>4</sub> emission from the  
 270 blowout.  
 271

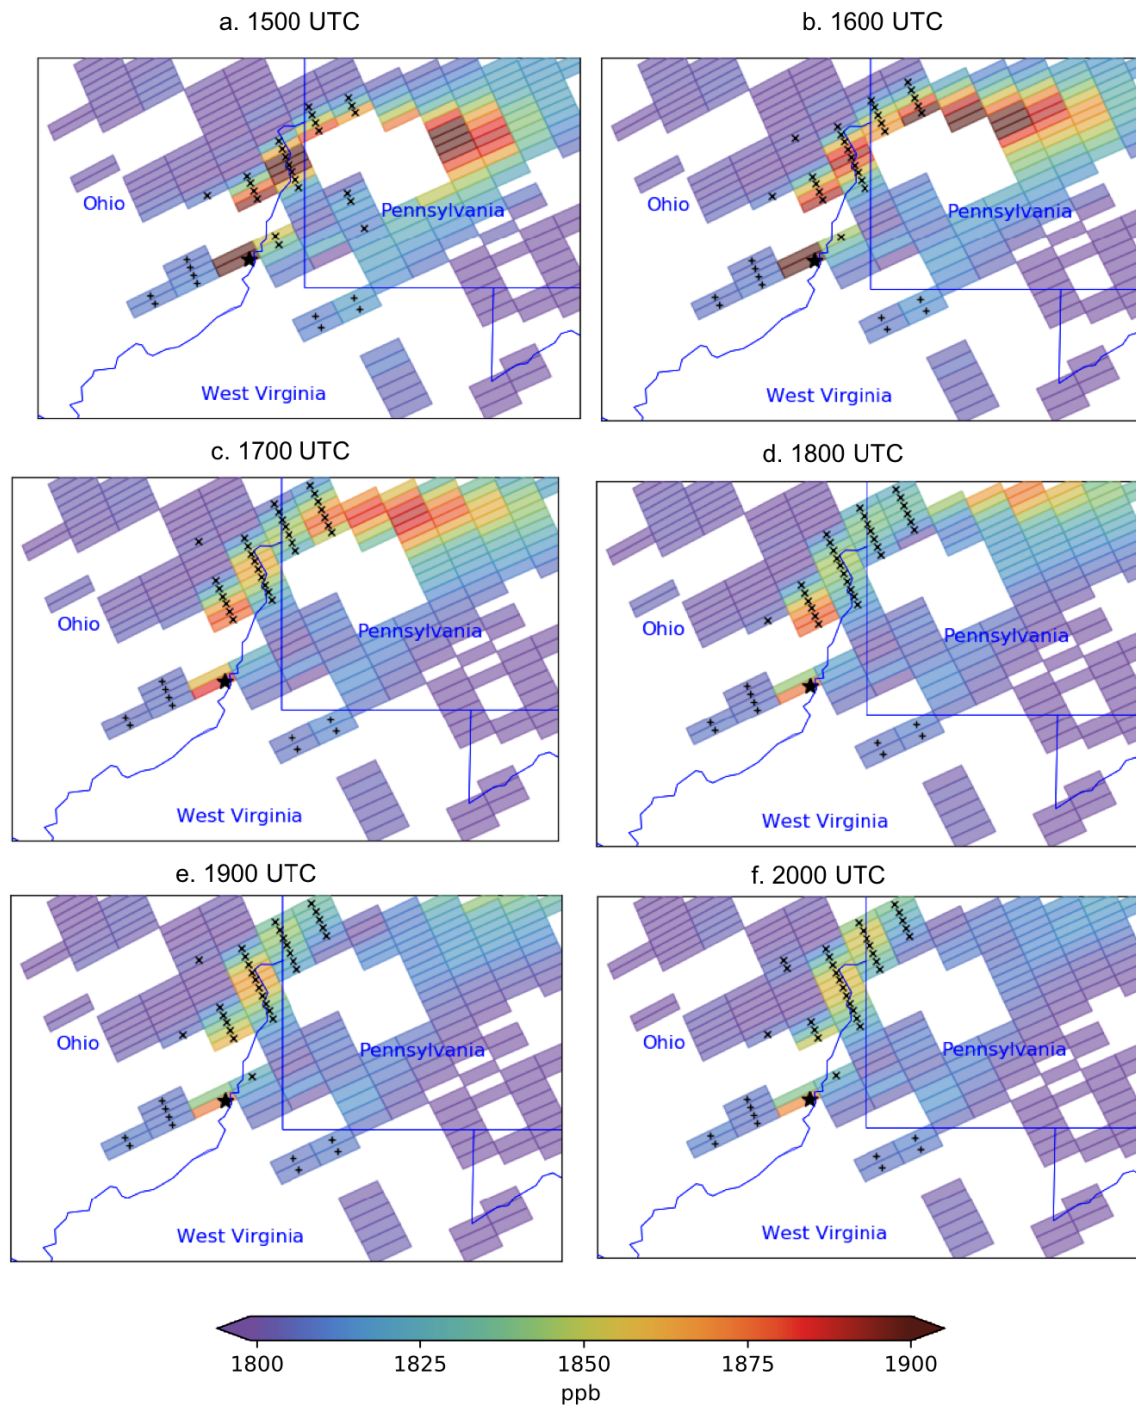

272  
 273 **Fig. S3:** WRF XCH<sub>4</sub> as in Fig. 2b in the main text for different hours adjacent to the TROPOMI  
 274 overpass time on 27 February 2018 and the corresponding blowout-influenced (crosses) and  
 275 background pixels (pluses). Note that the influence mask is different for each hour as it is  
 276 calculated using the corresponding blowout tracer output.  
 277

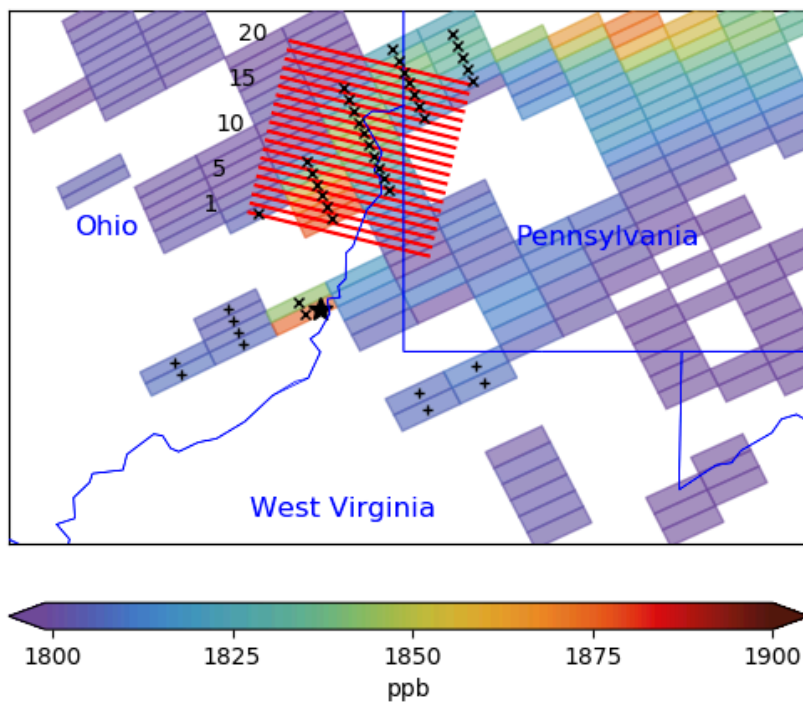

278  
 279 **Fig. S4.** As Fig. 2c of the main text, for CH<sub>4</sub> emission quantification using the CSF method. The  
 280 red lines are the transect lines perpendicular to the wind direction at the blowout location.  
 281 Emission estimates obtained per transect line are shown in Fig. S5.  
 282

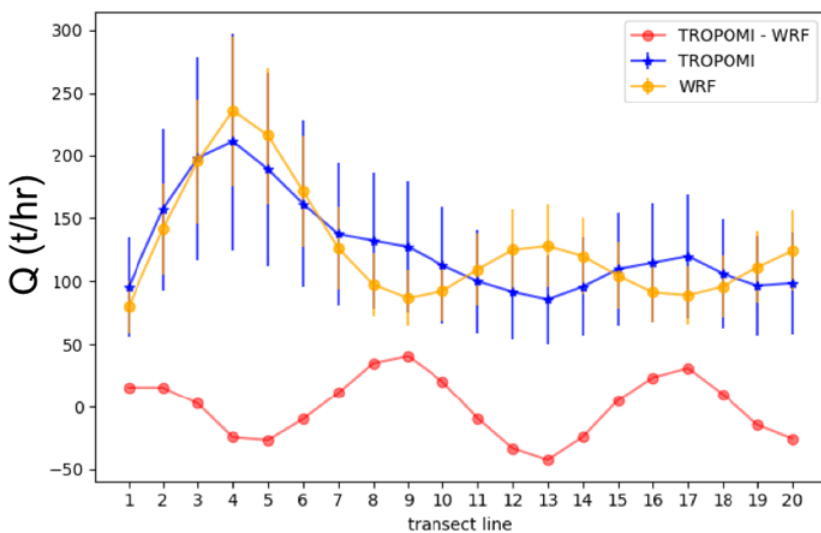

283  
 284 **Fig S5.** CH<sub>4</sub> emission rate, with 1 standard deviation uncertainty, calculated from TROPOMI  
 285 XCH<sub>4</sub> along the different transect lines shown in Fig. S4 using the CSF method. WRF-derived  
 286 emission rates are also plotted. Note that, to facilitate visual comparison, the WRF emission rates  
 287 are multiplied by 1.62 such that their mean is equal to the mean of the TROPOMI- derived  
 288 emission rates.  
 289

290  
291

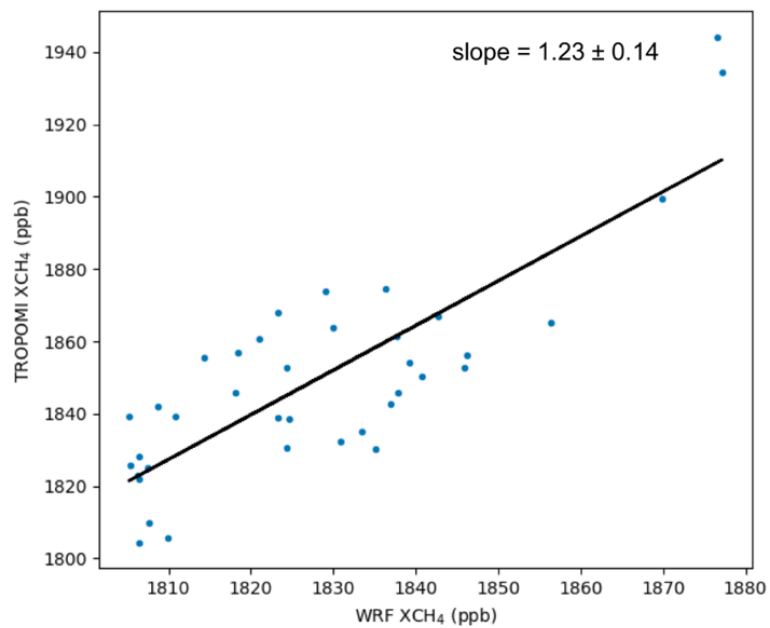

292  
293  
294  
295  
296

**Fig. S6 TROPOMI measurements vs WRF-simulated XCH<sub>4</sub>.** Only the blowout-influenced and background pixels, marked with crosses and pluses in Figure 2c, are plotted.

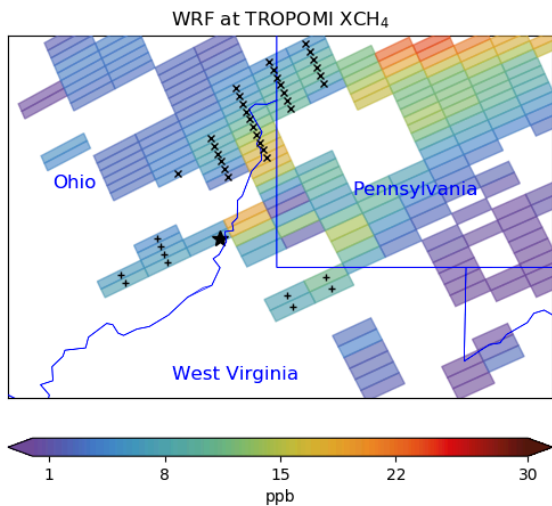

297  
298  
299  
300

**Fig. S7.** WRF XCH<sub>4</sub> for the EPA tracer. The crosses and pluses mark the blowout-influenced and background pixels, respectively.

301

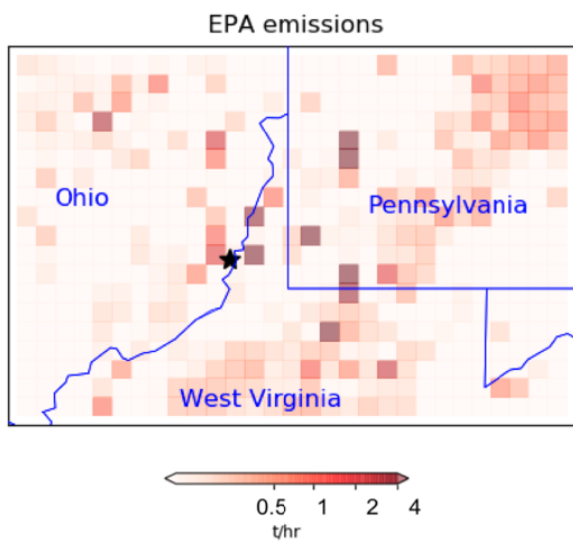

302  
303  
304  
305  
306

**Fig. S8.** Anthropogenic CH<sub>4</sub> emission in the blowout region for 2012 according to EPA 2012 inventory. The blowout location is marked with a black star.



307  
308  
309

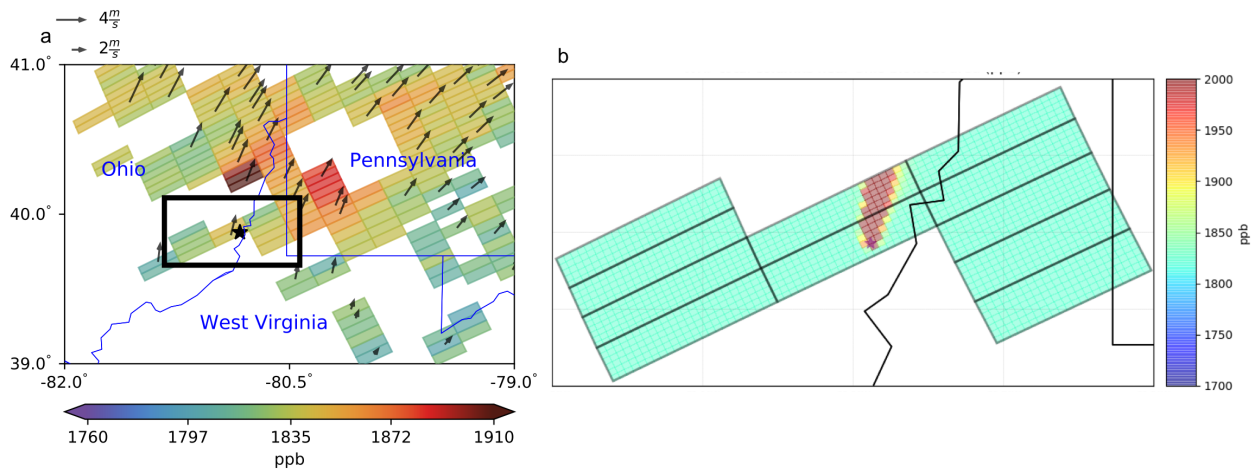

310  
311  
312  
313  
314  
315  
316  
317  
318

**Fig S9. Illustration of partial pixel enhancement based in a high resolution WRF run.** XCH<sub>4</sub> measurements (left panel; as in Fig. 1b of main text) and high resolution (1x1 km<sup>2</sup>) WRF XCH<sub>4</sub> (right panel) within the TROPOMI pixels over the blowout location. The star marks the location of blowout well. The black box in the left panel shows the region that is enlarged in the right panel. The color scale of the right panel has been adjusted to facilitate the visualization of the plume.

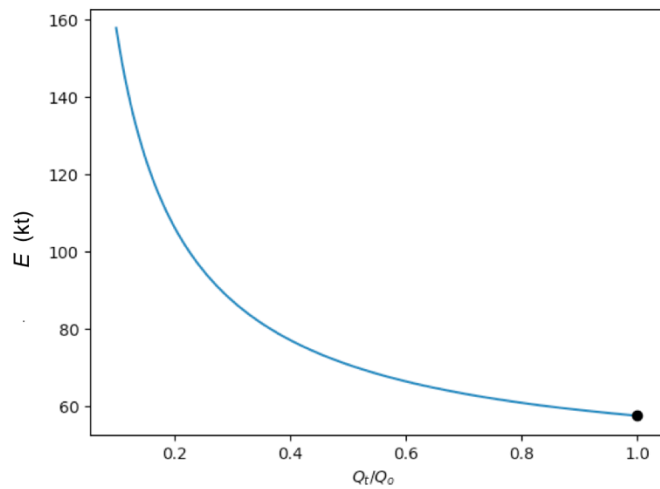

319  
320  
321  
322  
323  
324

**Fig. S10.** Total emissions  $E$  from the Ohio blowout in 20 days as function of ratio between initial ( $Q_0$ ) and measured emission rate ( $Q_t$ ). If the ratio between emission rates is 1 (black dot),  $E = 57$  kt.

325

326 **Movie S1.**

327 Movie of the leakage from the blowout on 3 March 2018 taken with FLIR (Forward Looking  
328 InfraRed) optical gas imaging cameras by Earthworks.

329

330

331

332

333

334

335

336 **References**

- 337 1. D. J. Varon et al., Quantifying methane point sources from fine-scale satellite  
338 observations of atmospheric methane plumes. *Atmospheric Measurement*  
339 *Techniques* **11**(10), 5673-5686 (2018).
- 340 2. E. A. Kort et al., Four corners: The largest US methane anomaly viewed from space.  
341 *Geophysical Research Letters* **41**, 6898–6903 (2014).  
342 <https://doi.org/10.1002/2014GL061503>
- 343 3. S. Conley et al., Methane emissions from the 2015 Aliso Canyon blowout in Los Angeles,  
344 CA. *Science*, **351**, 1317–1321 (2016).
- 345 4. J. D. Lee et al., Flow rate and source reservoir identification from airborne chemical  
346 sampling of the uncontrolled Elgin platform gas release. *Atmos. Meas. Tech* **11**, 1725–  
347 1739 (2018). <https://doi.org/10.5194/amt-11-1725-2018>
- 348 5. National Centers for Environmental Prediction/National Weather Service/NOAA/U.S.  
349 Department of Commerce. 2000, updated daily. *NCEP FNL Operational Model Global*  
350 *Tropospheric Analyses, continuing from July 1999*. Research Data Archive at the National  
351 Center for Atmospheric Research, Computational and Information Systems Laboratory.  
352 <https://doi.org/10.5065/D6M043C6>. Accessed on 05-08-2019.
- 353 6. Copernicus Climate Change Service (C3S), “ERA5: Fifth generation of ECMWF  
354 atmospheric reanalyses of the global climate” (Copernicus Climate Change Service  
355 Climate Data Store (CDS), 2019; <https://cds.climate.copernicus.eu/cdsapp#!/home>)  
356 Accessed on 05-08-2019.
- 357 7. D. P. Dee et al., The ERA-Interim reanalysis: Configuration and performance of the data  
358 assimilation system. *Quarterly Journal of the Royal Meteorological Society* **137**:656,  
359 553–597 (2011).

360
